# Supplementary material for: Stereoselective synthesis of (−)-1-epi-ventiloquinone L and (+)-ventiloquinone L, the monomeric unit of cardinalin 3
Source: Royal Society of Chemistry journal article supplement (doi:10.1039/c2ob25453k), 2012-01-01

## Supporting Information

### **Stereoselective synthesis of (–)-1-*epi*-ventiloquinone L and (+)-ventiloquinone L, the monomeric unit of cardinalin 3**

Rodney A. Fernandes,\* Arun B. Ingle and Vijay P. Chavan

*Department of Chemistry, Indian Institute of Technology Bombay, Powai, Mumbai 400 076  
Maharashtra, India. [rfernand@chem.iitb.ac.in](mailto:rfernand@chem.iitb.ac.in)*

#### **Contents**

Copies of <sup>1</sup>H and <sup>13</sup>C NMR spectrum for compound **8**, **9**, **4**, **10a**, **10b**, **11a**, **11b**, **1**, and **2**.....pages 2-19.

Compound 8 <sup>1</sup>H NMR (400 MHz, CDCl<sub>3</sub>/TMS)

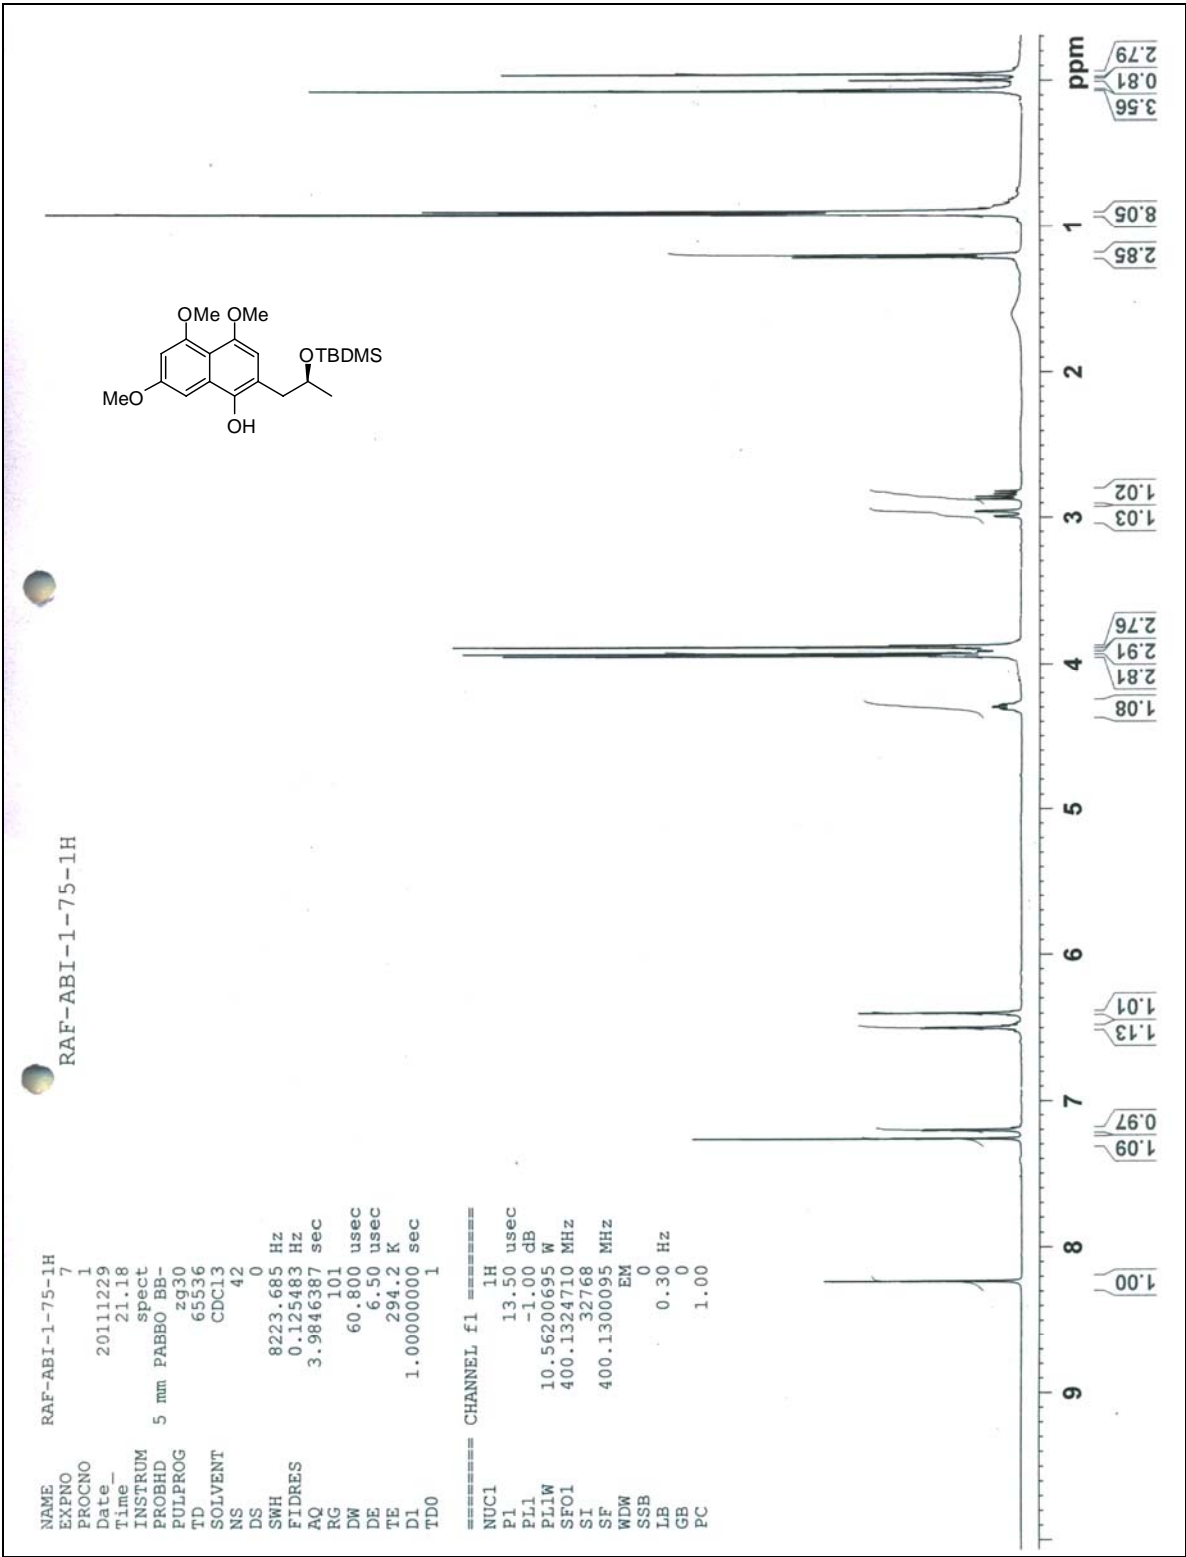

Compound 8 <sup>13</sup>C NMR (100 MHz)

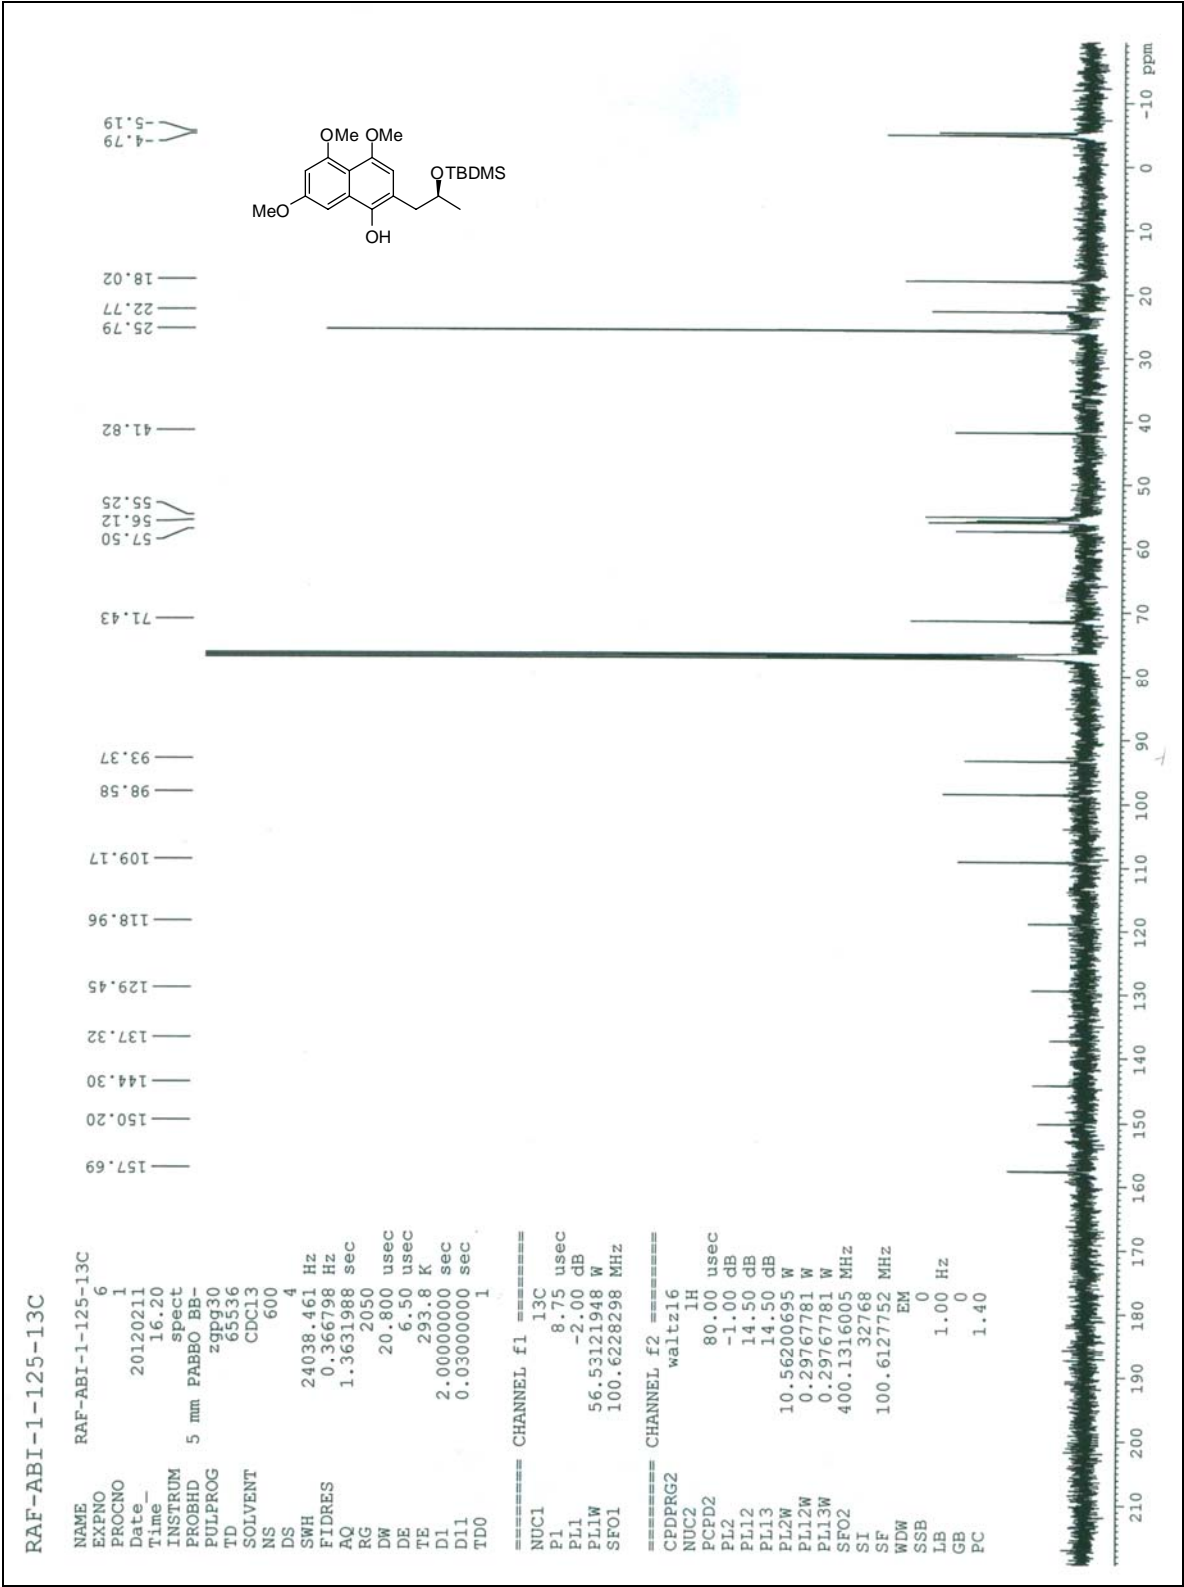

Compound 9 <sup>1</sup>H NMR (400 MHz, CDCl<sub>3</sub>/TMS)

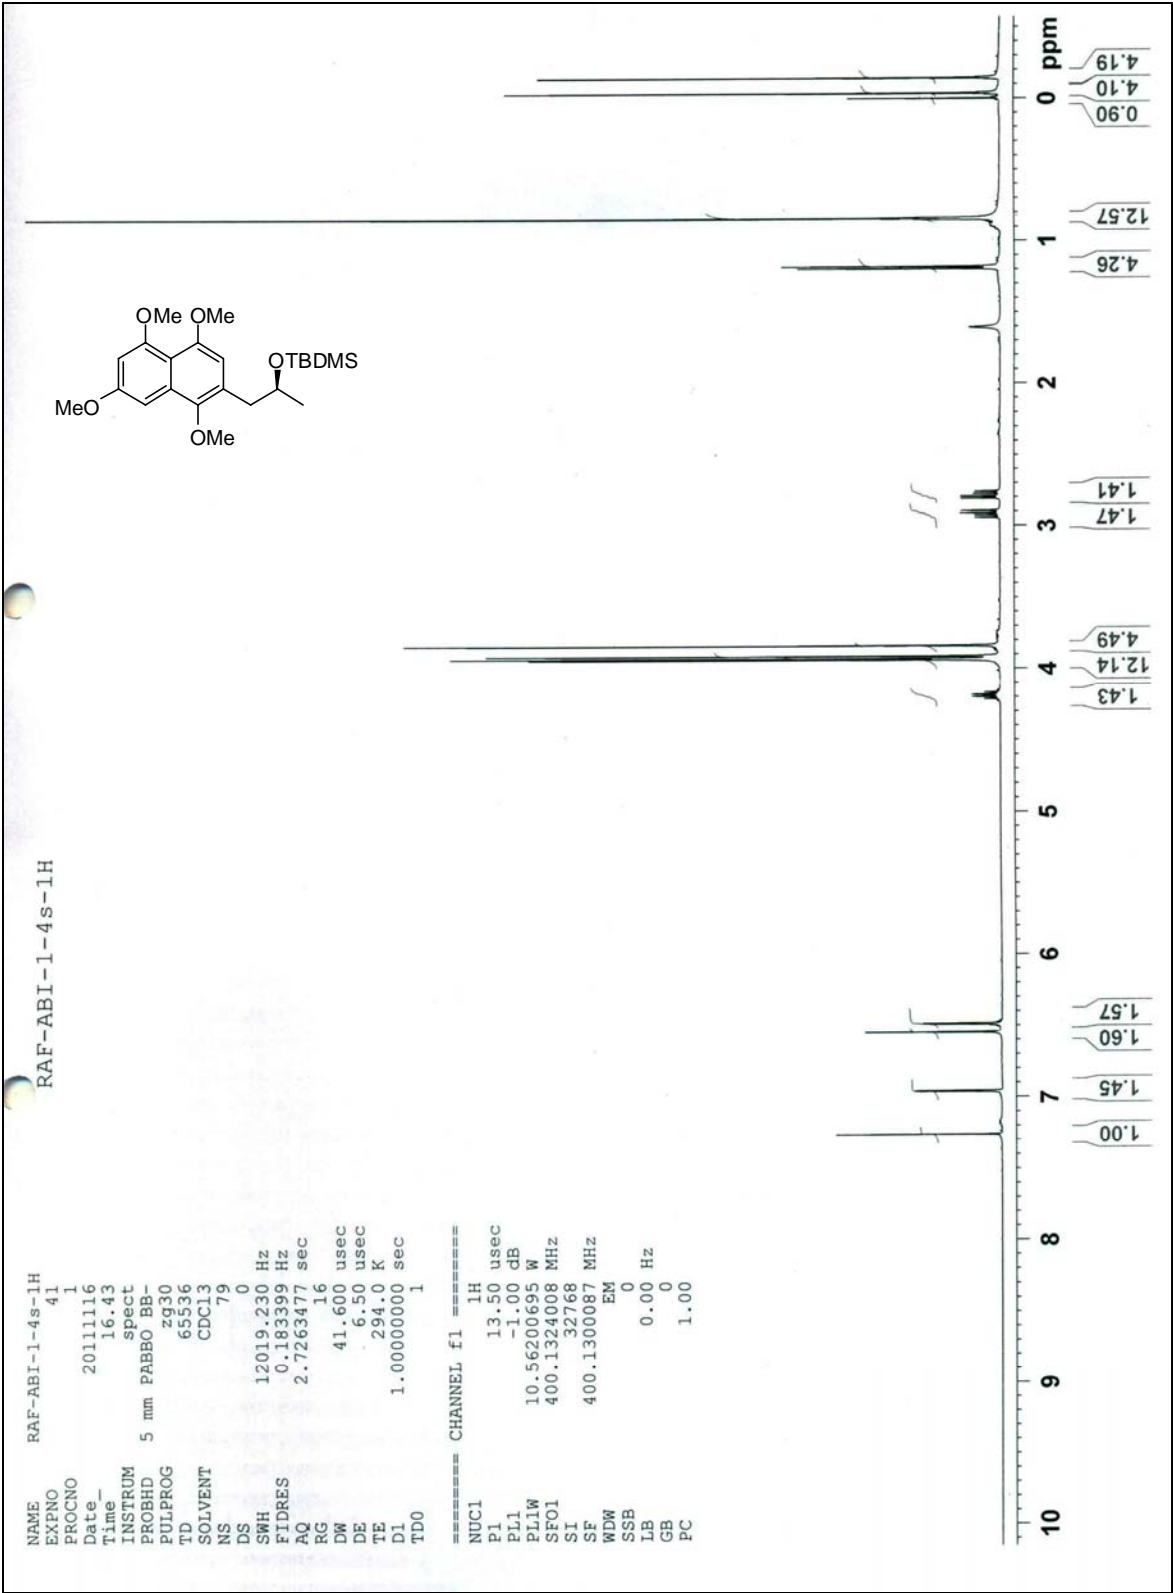

Compound 9 <sup>13</sup>C NMR (100 MHz)

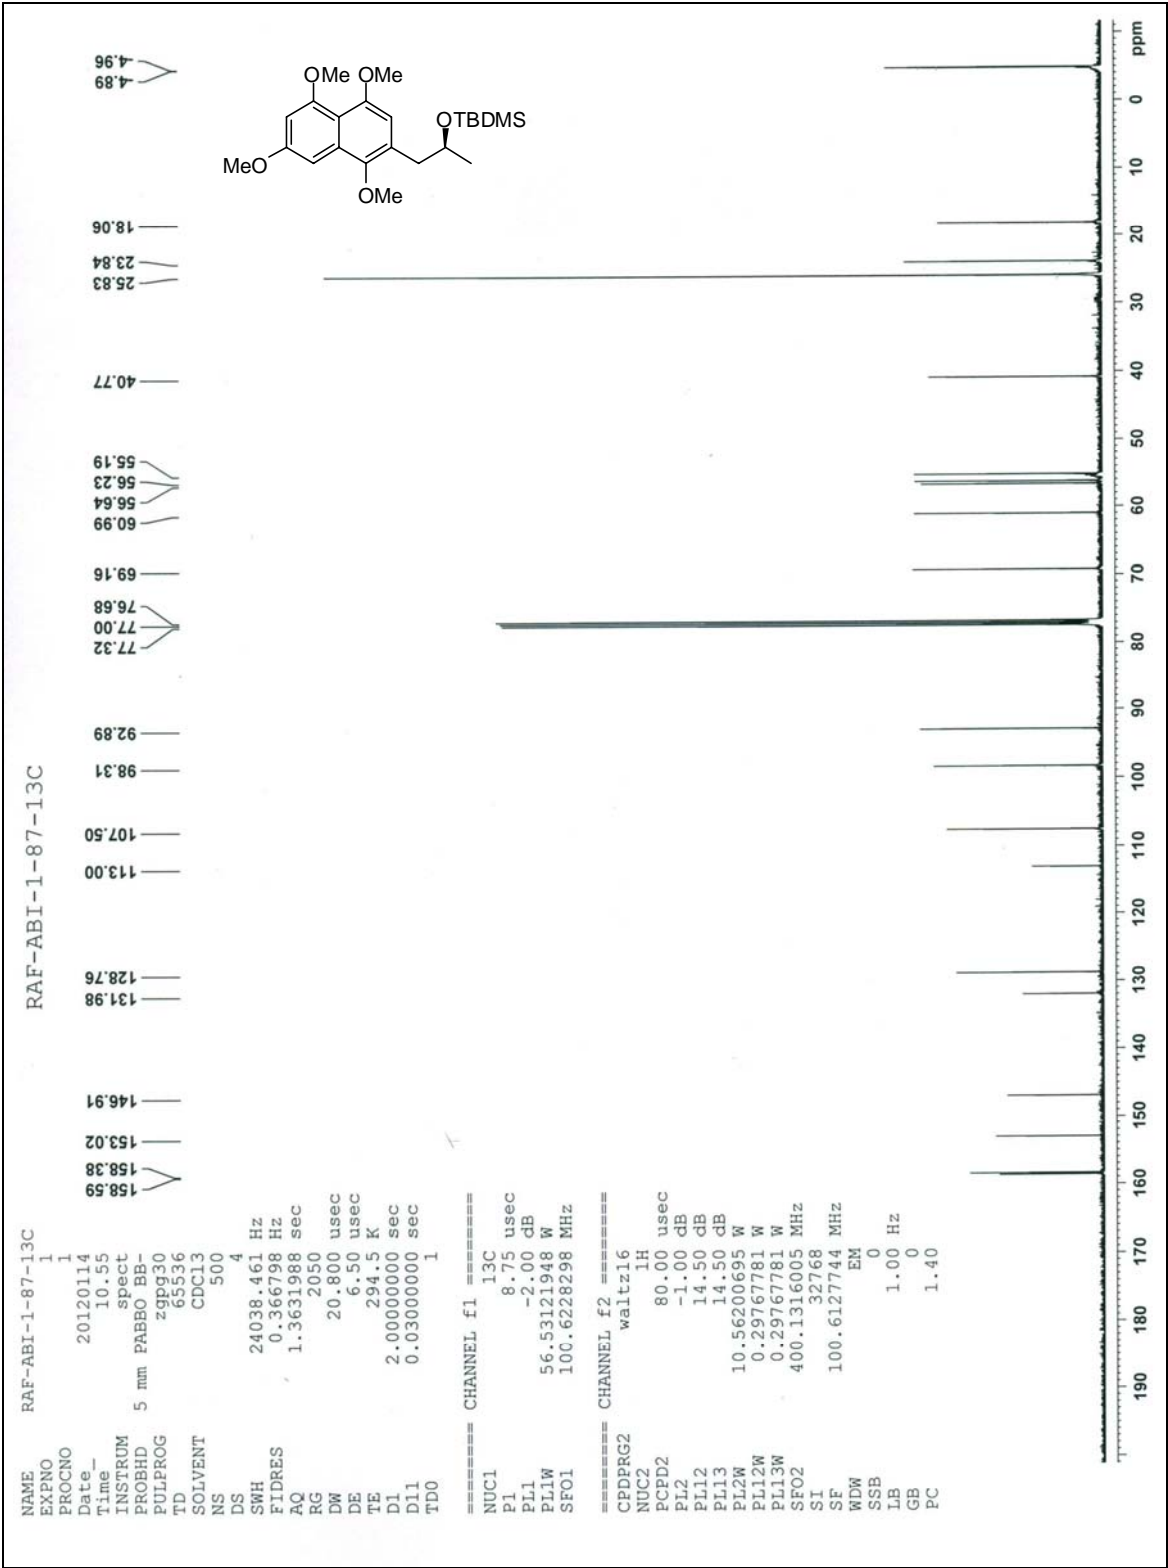

Compound 4 <sup>1</sup>H NMR (400 MHz, CDCl<sub>3</sub>/TMS)

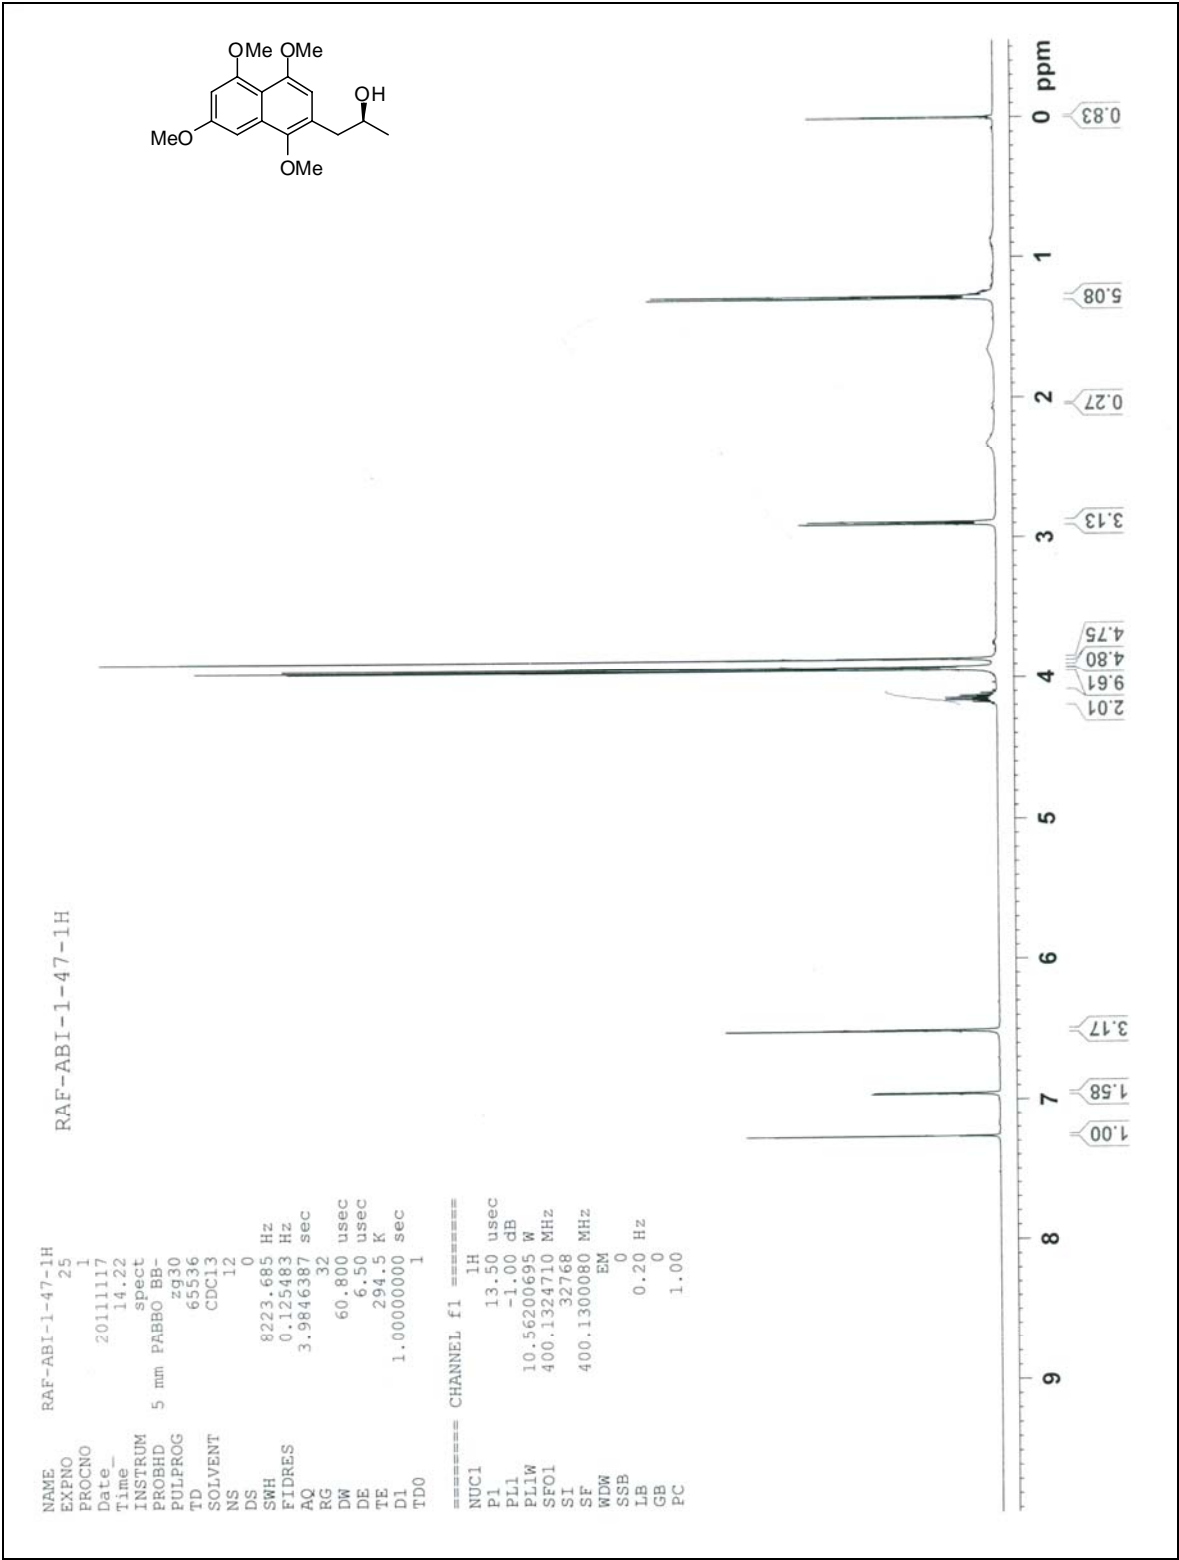

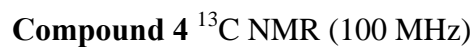

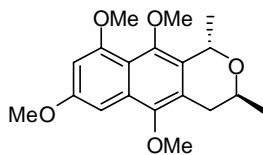



Compound 10a <sup>13</sup>C NMR (100 MHz)

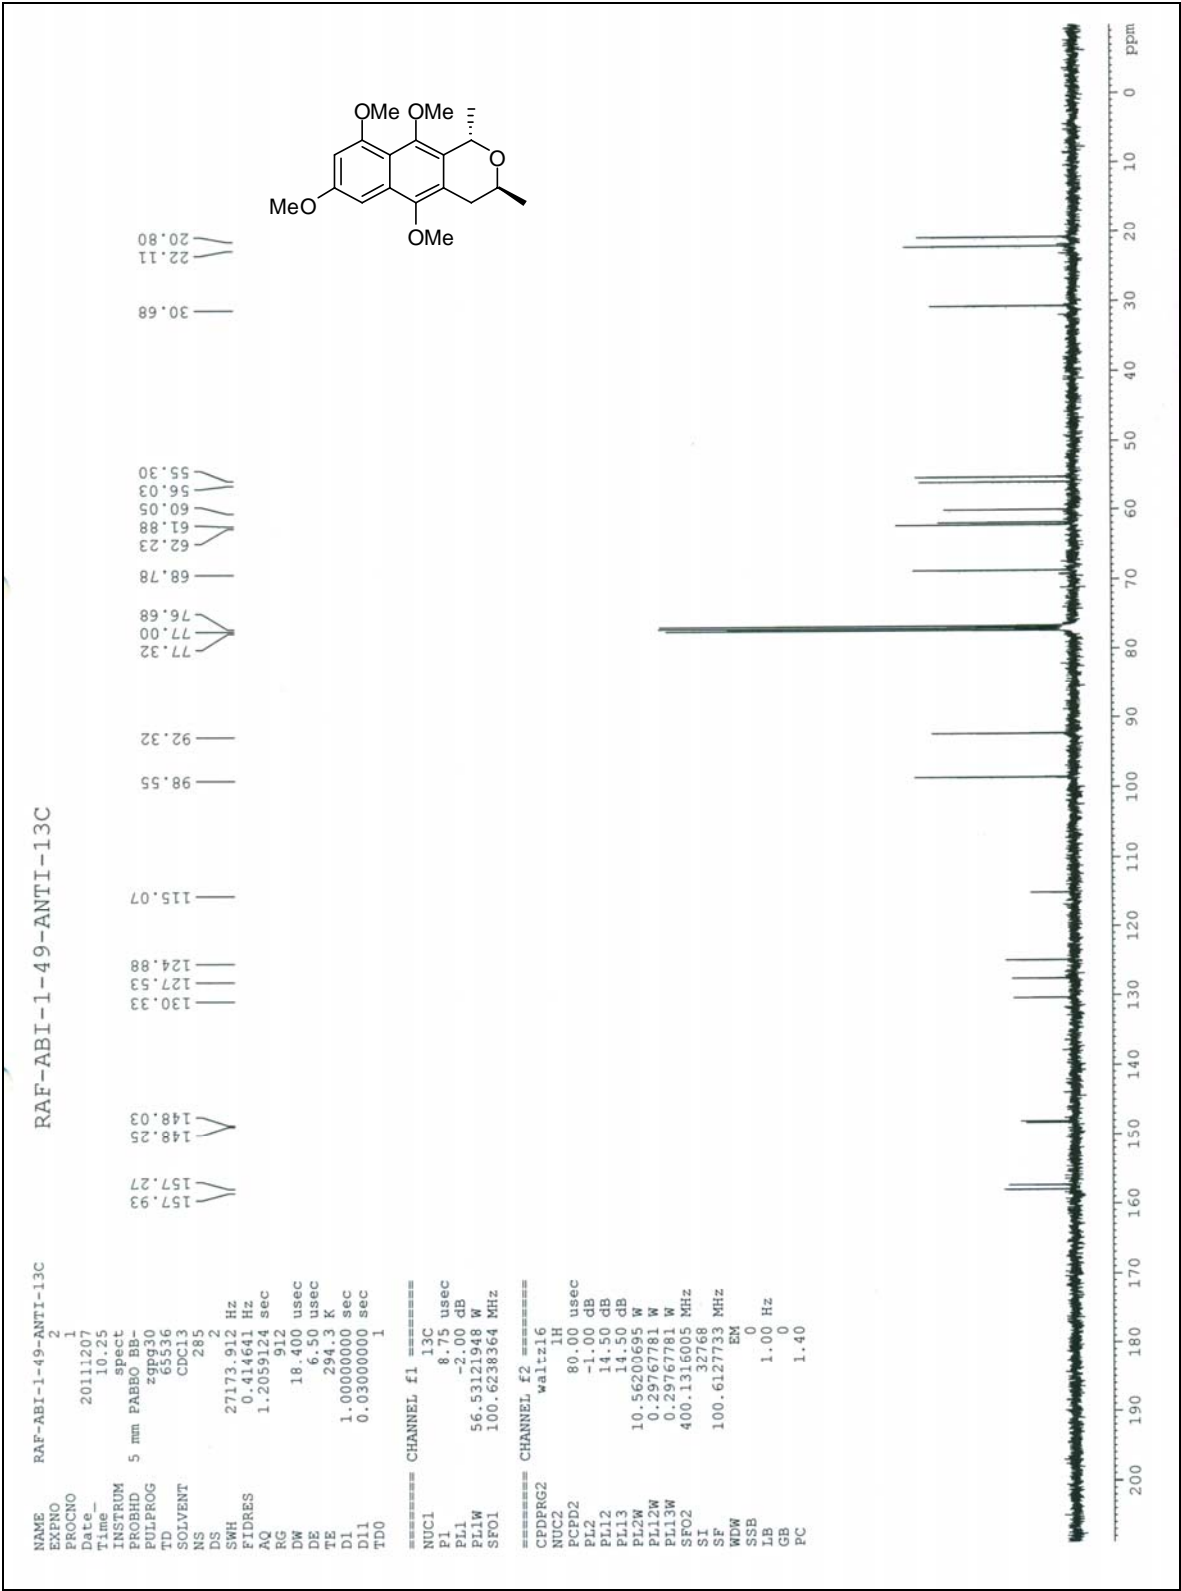

Compound 10b <sup>1</sup>H NMR (400 MHz, CDCl<sub>3</sub>/TMS)

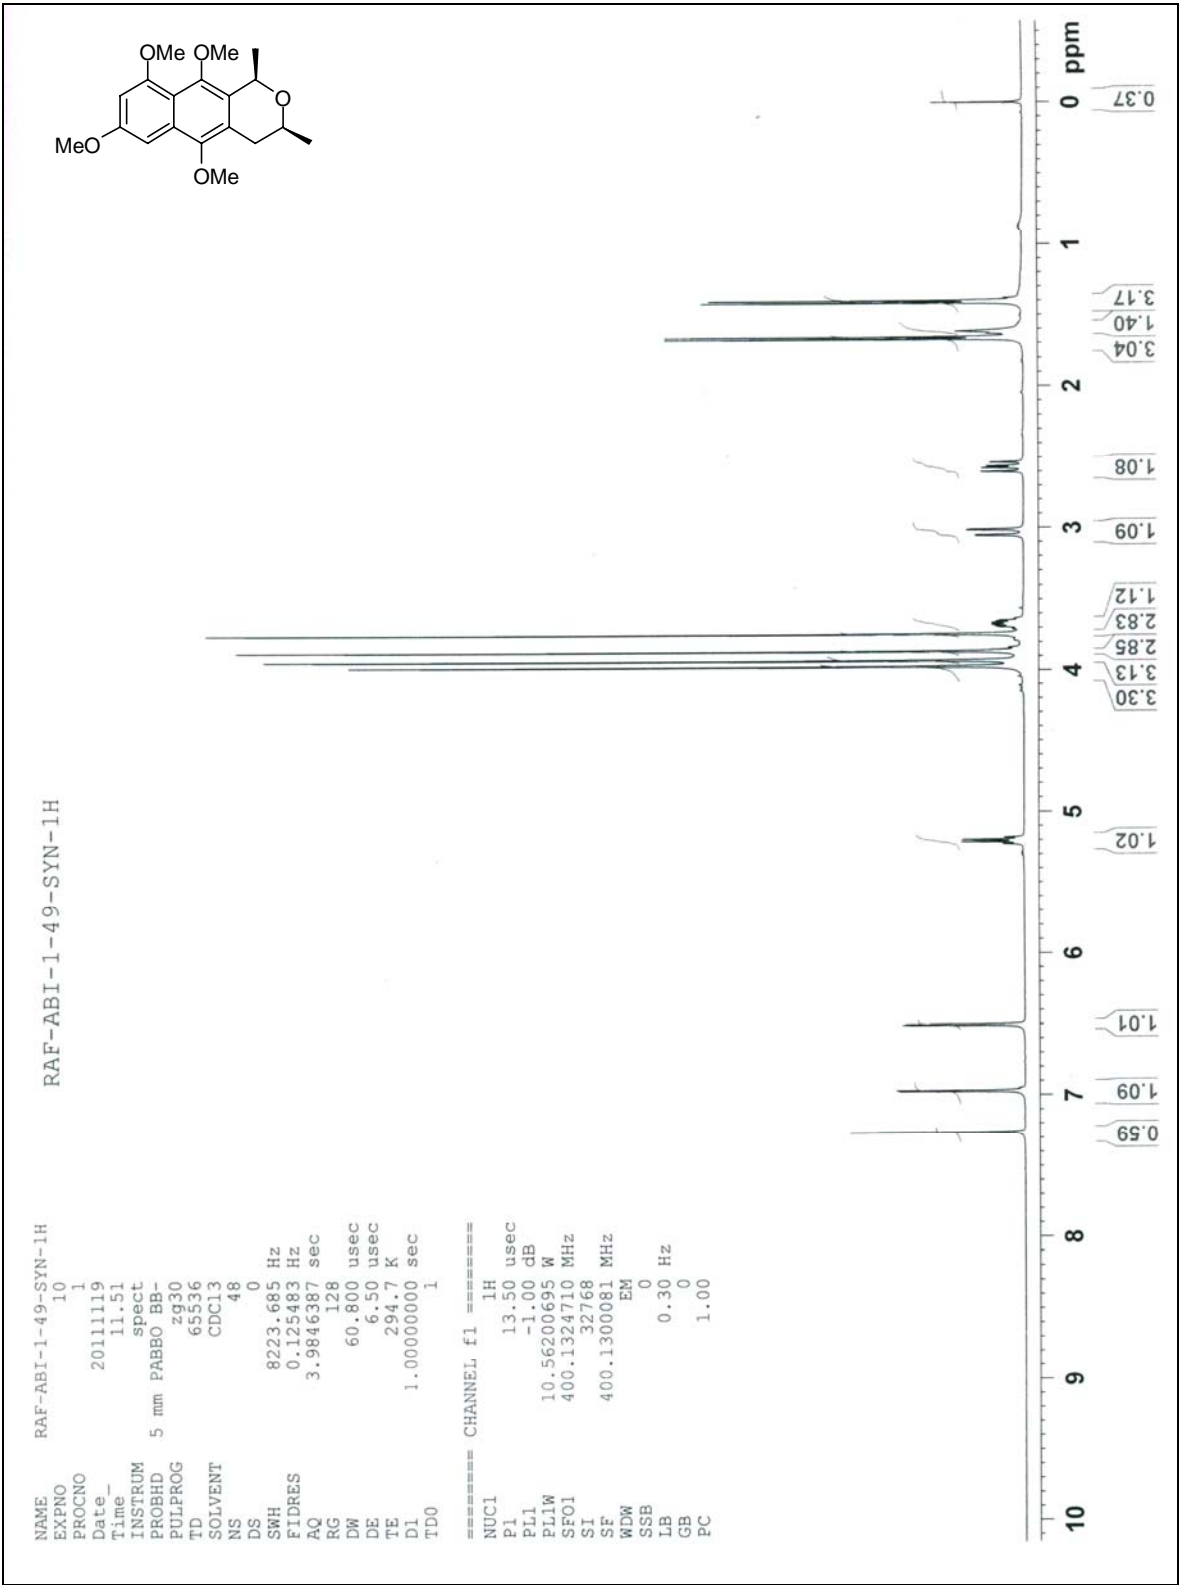

Compound 10b <sup>13</sup>C NMR (100 MHz)

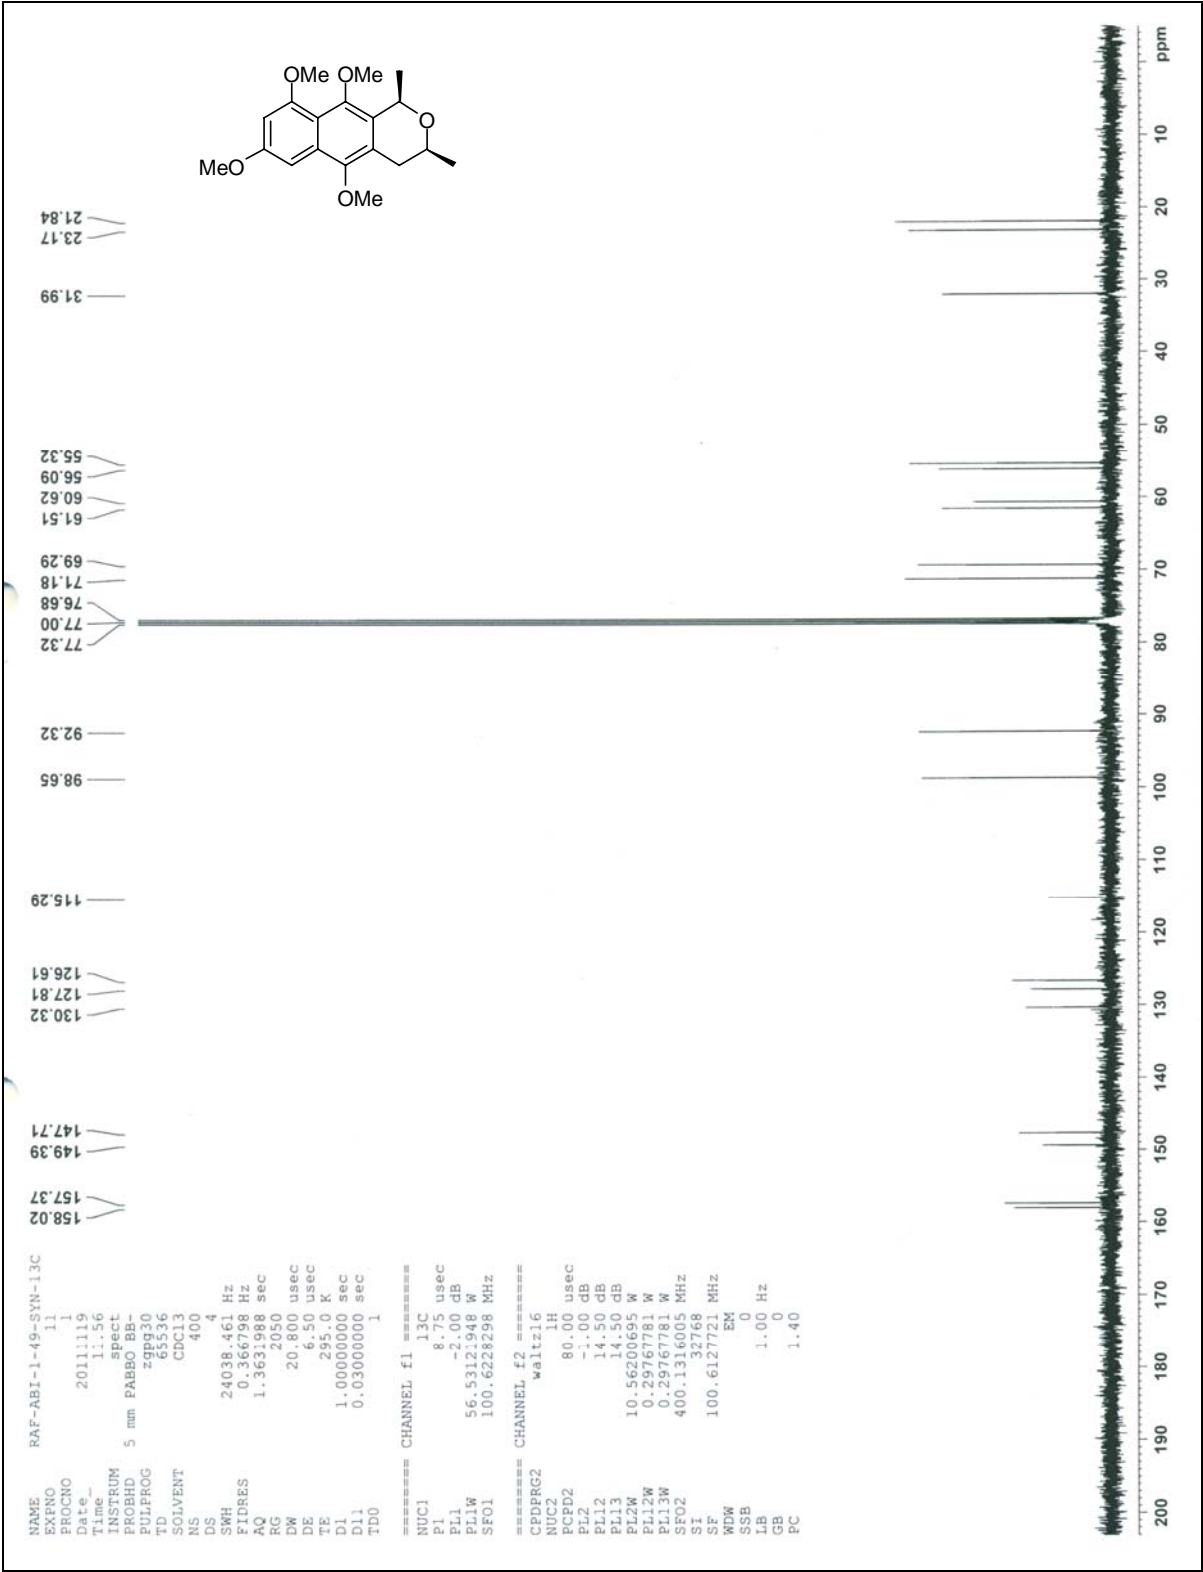

**Compound 11a**  $^1\text{H}$  NMR (400 MHz,  $\text{CDCl}_3/\text{TMS}$ )

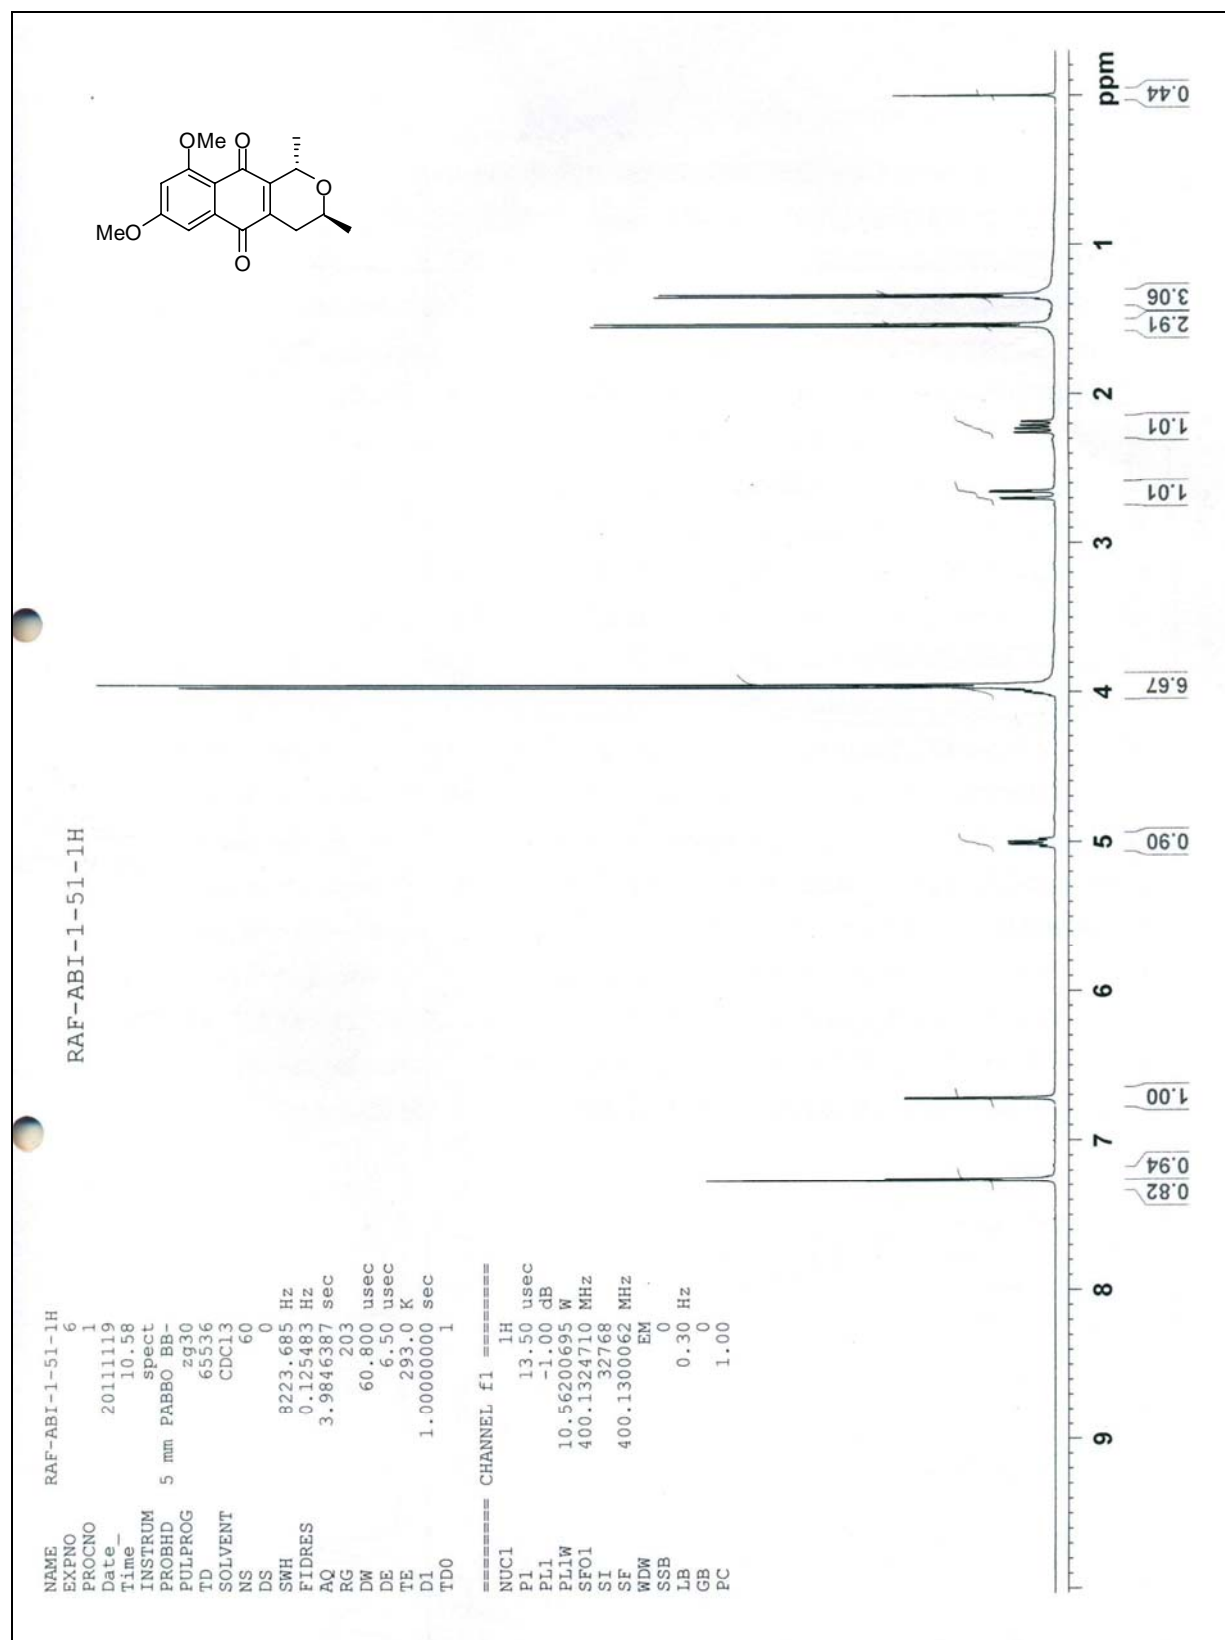

Compound 11a <sup>13</sup>C NMR (100 MHz)

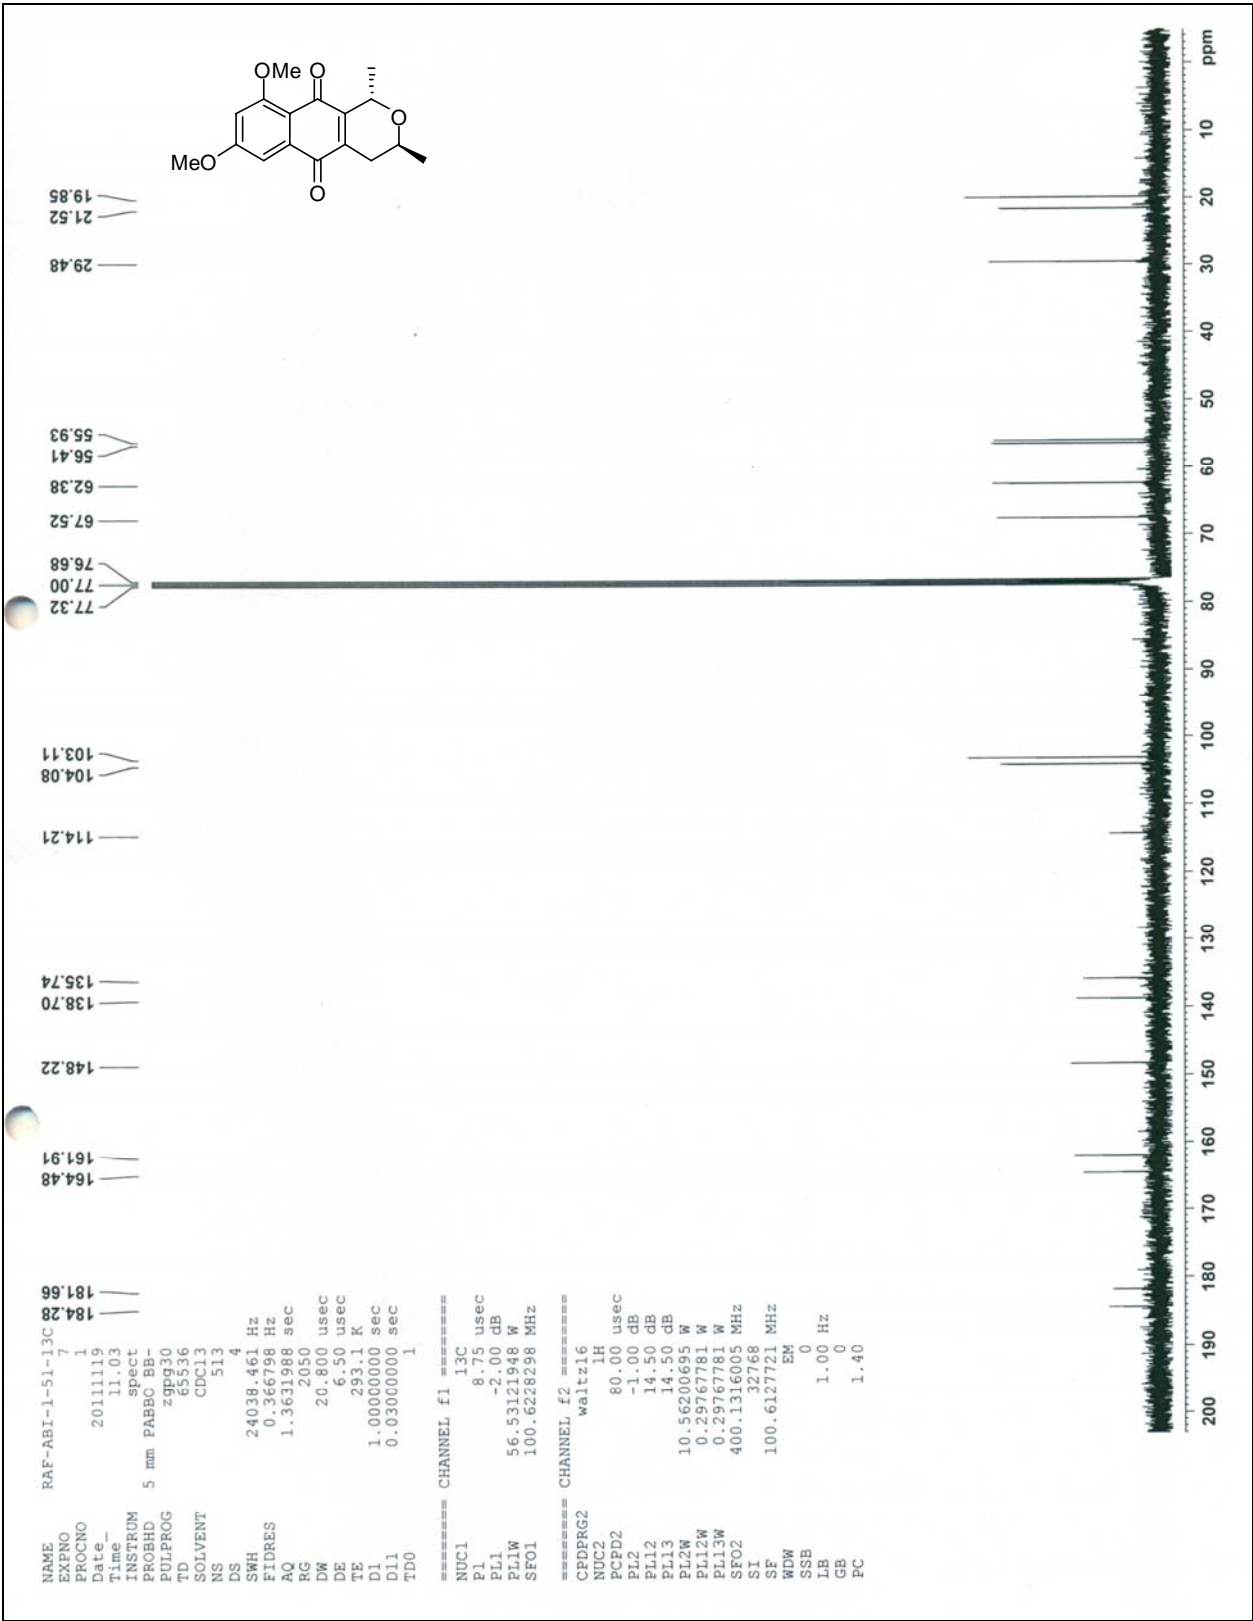

**Compound 11b**  $^1\text{H}$  NMR (400 MHz,  $\text{CDCl}_3/\text{TMS}$ )

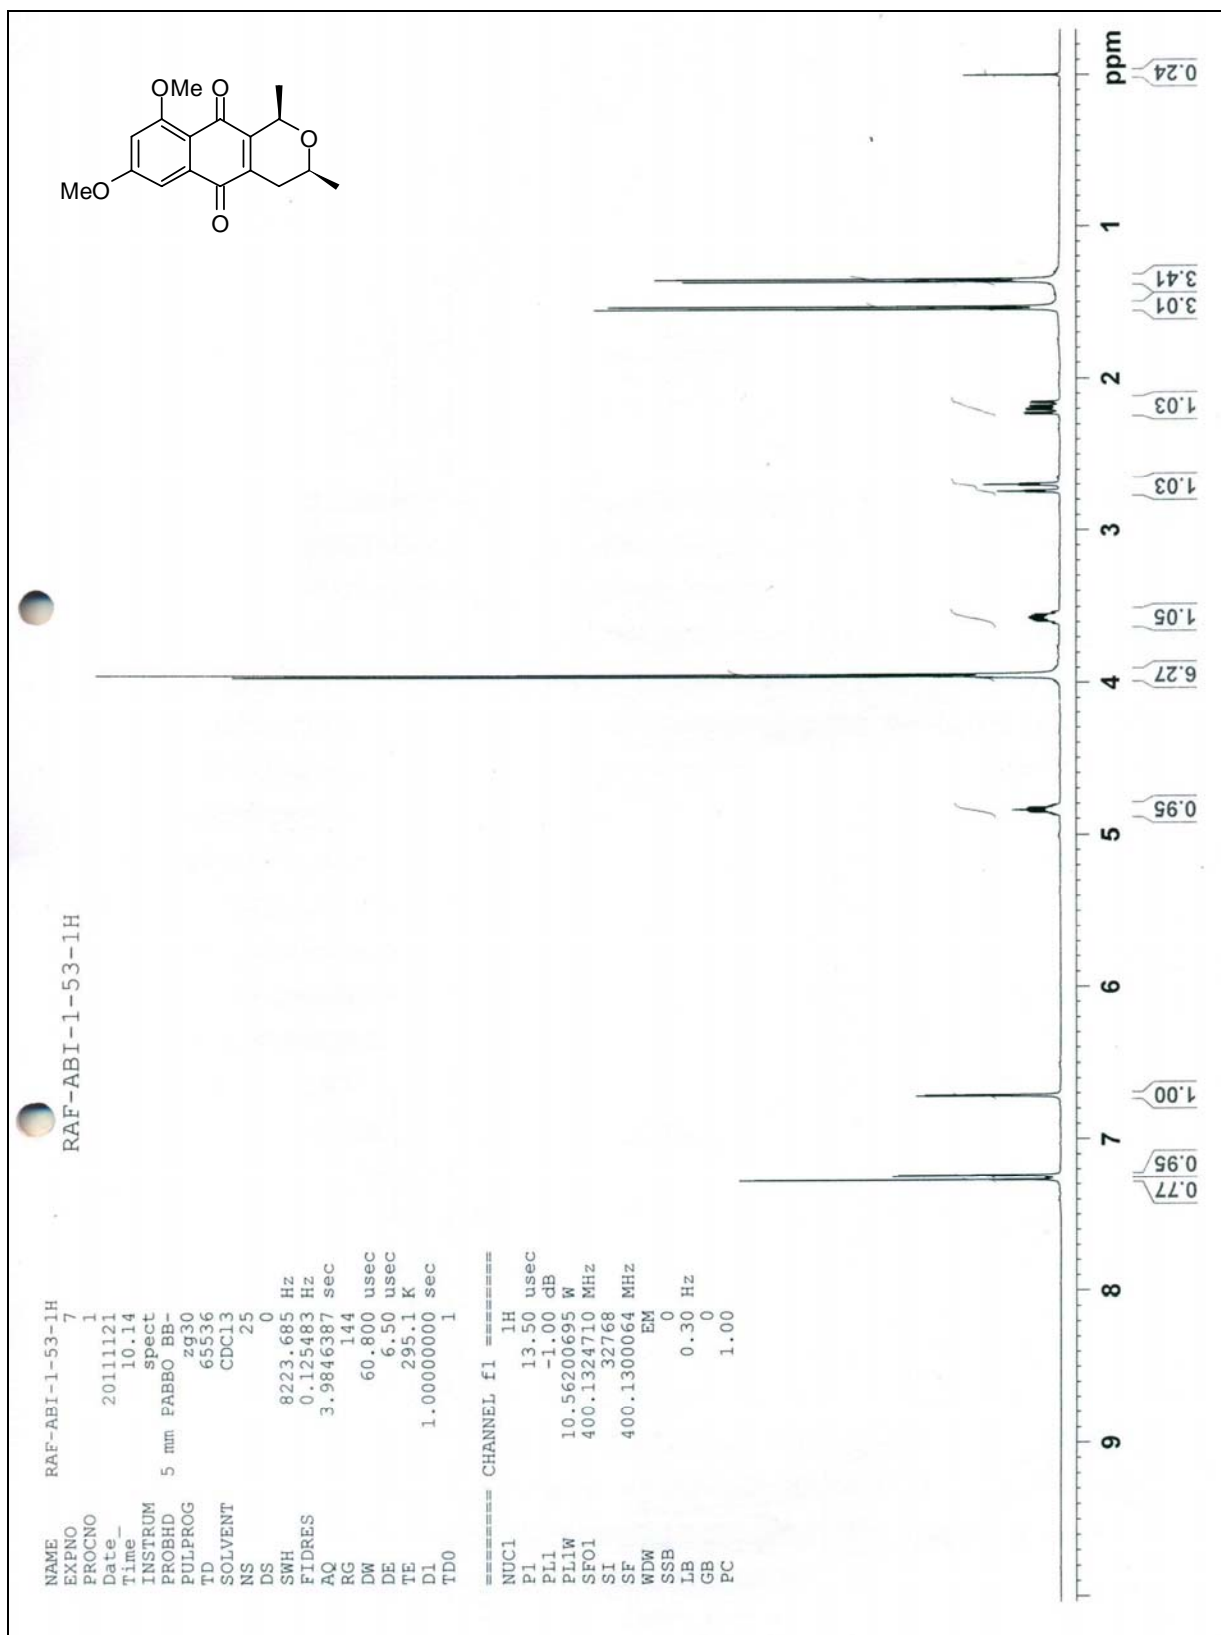

Compound 11b <sup>13</sup>C NMR (100 MHz)

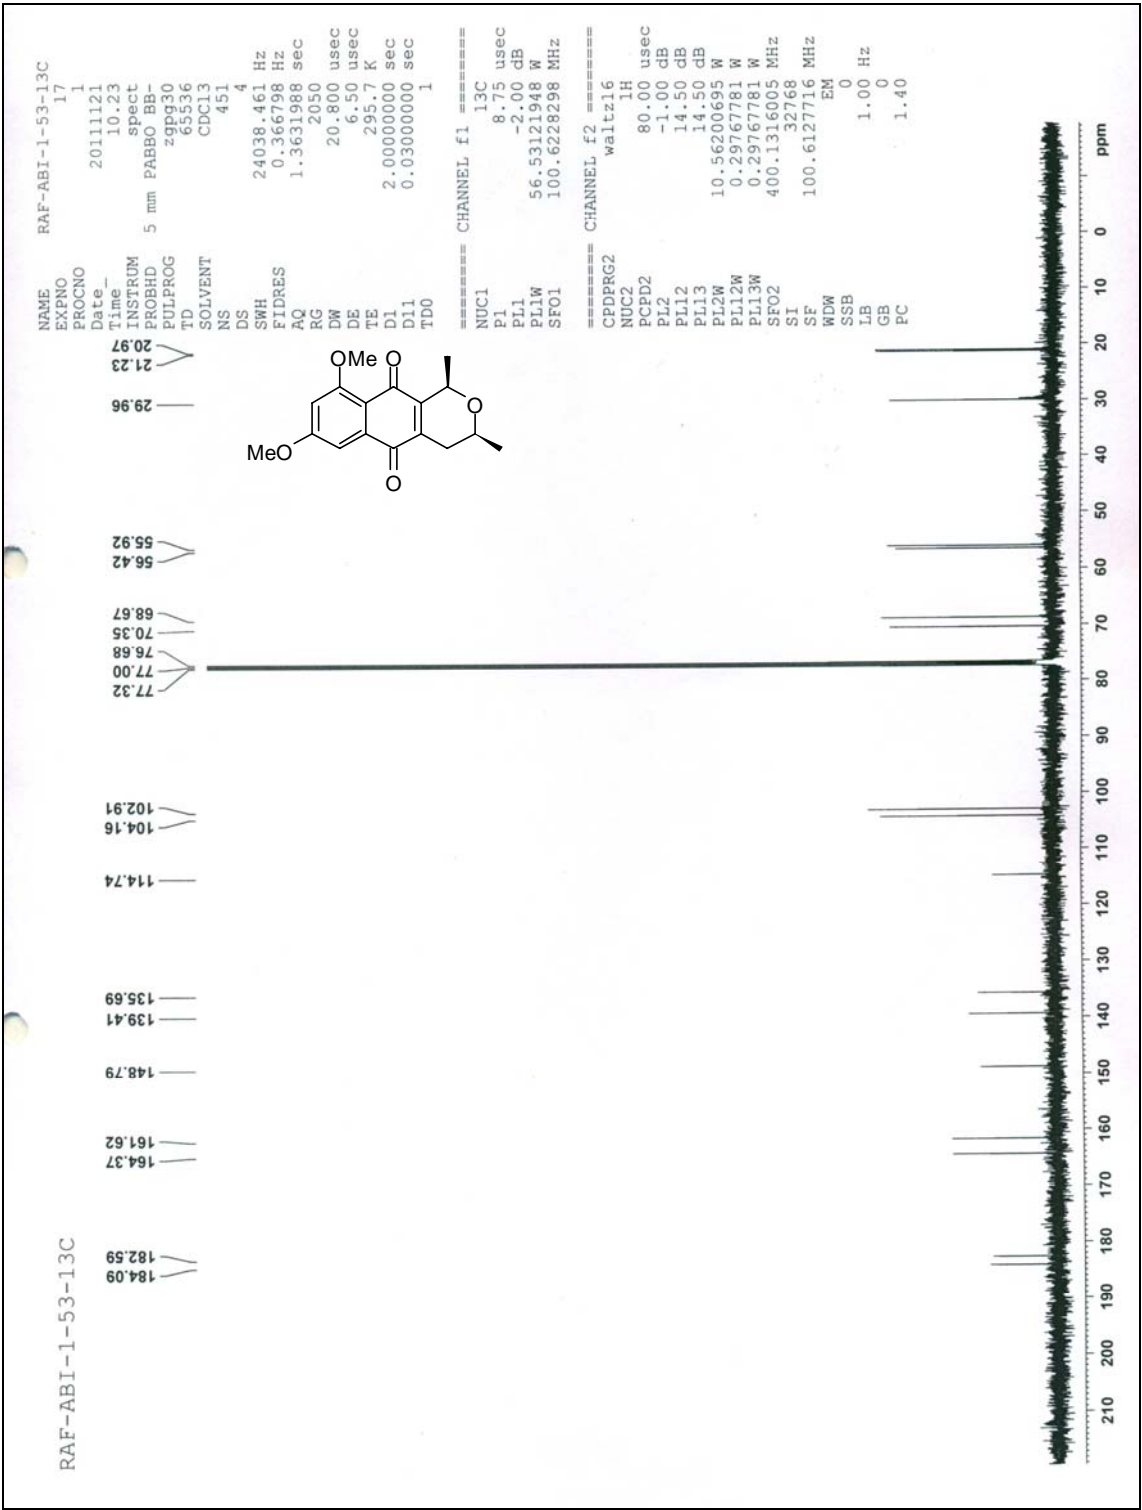



Compound 1 <sup>1</sup>H NMR (400 MHz, CDCl<sub>3</sub>/TMS)

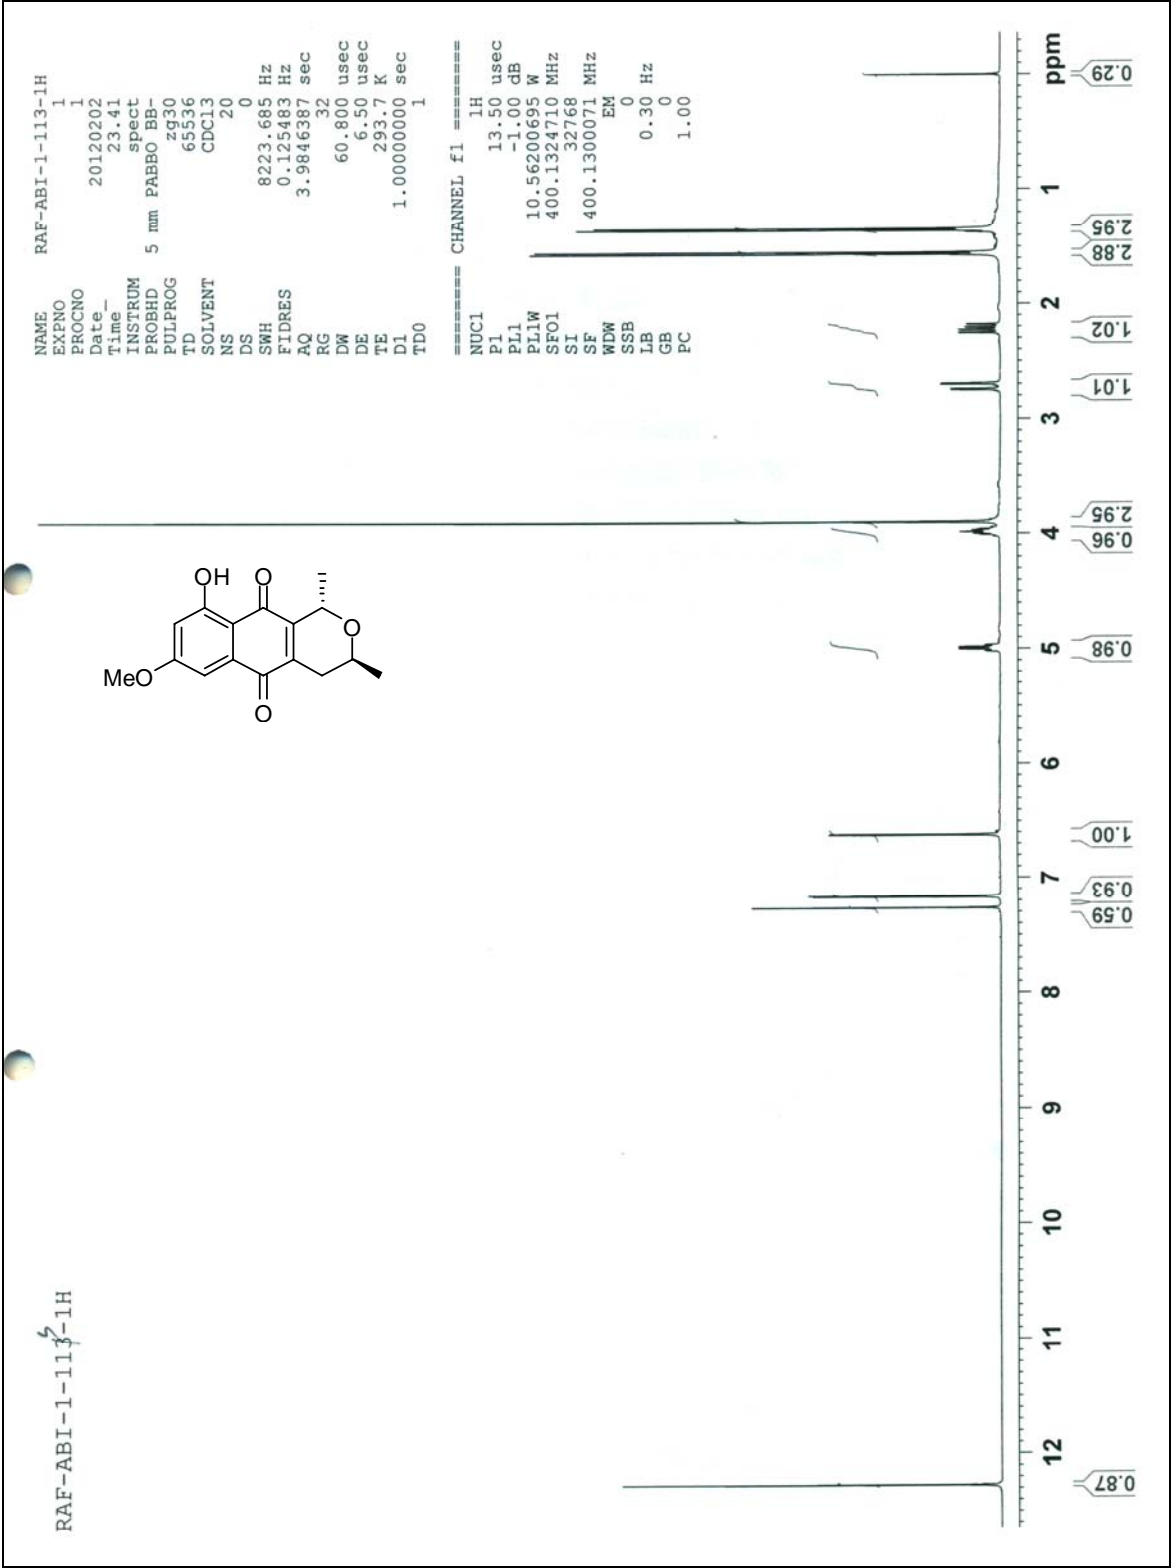



Compound 1 <sup>13</sup>C NMR (100 MHz)

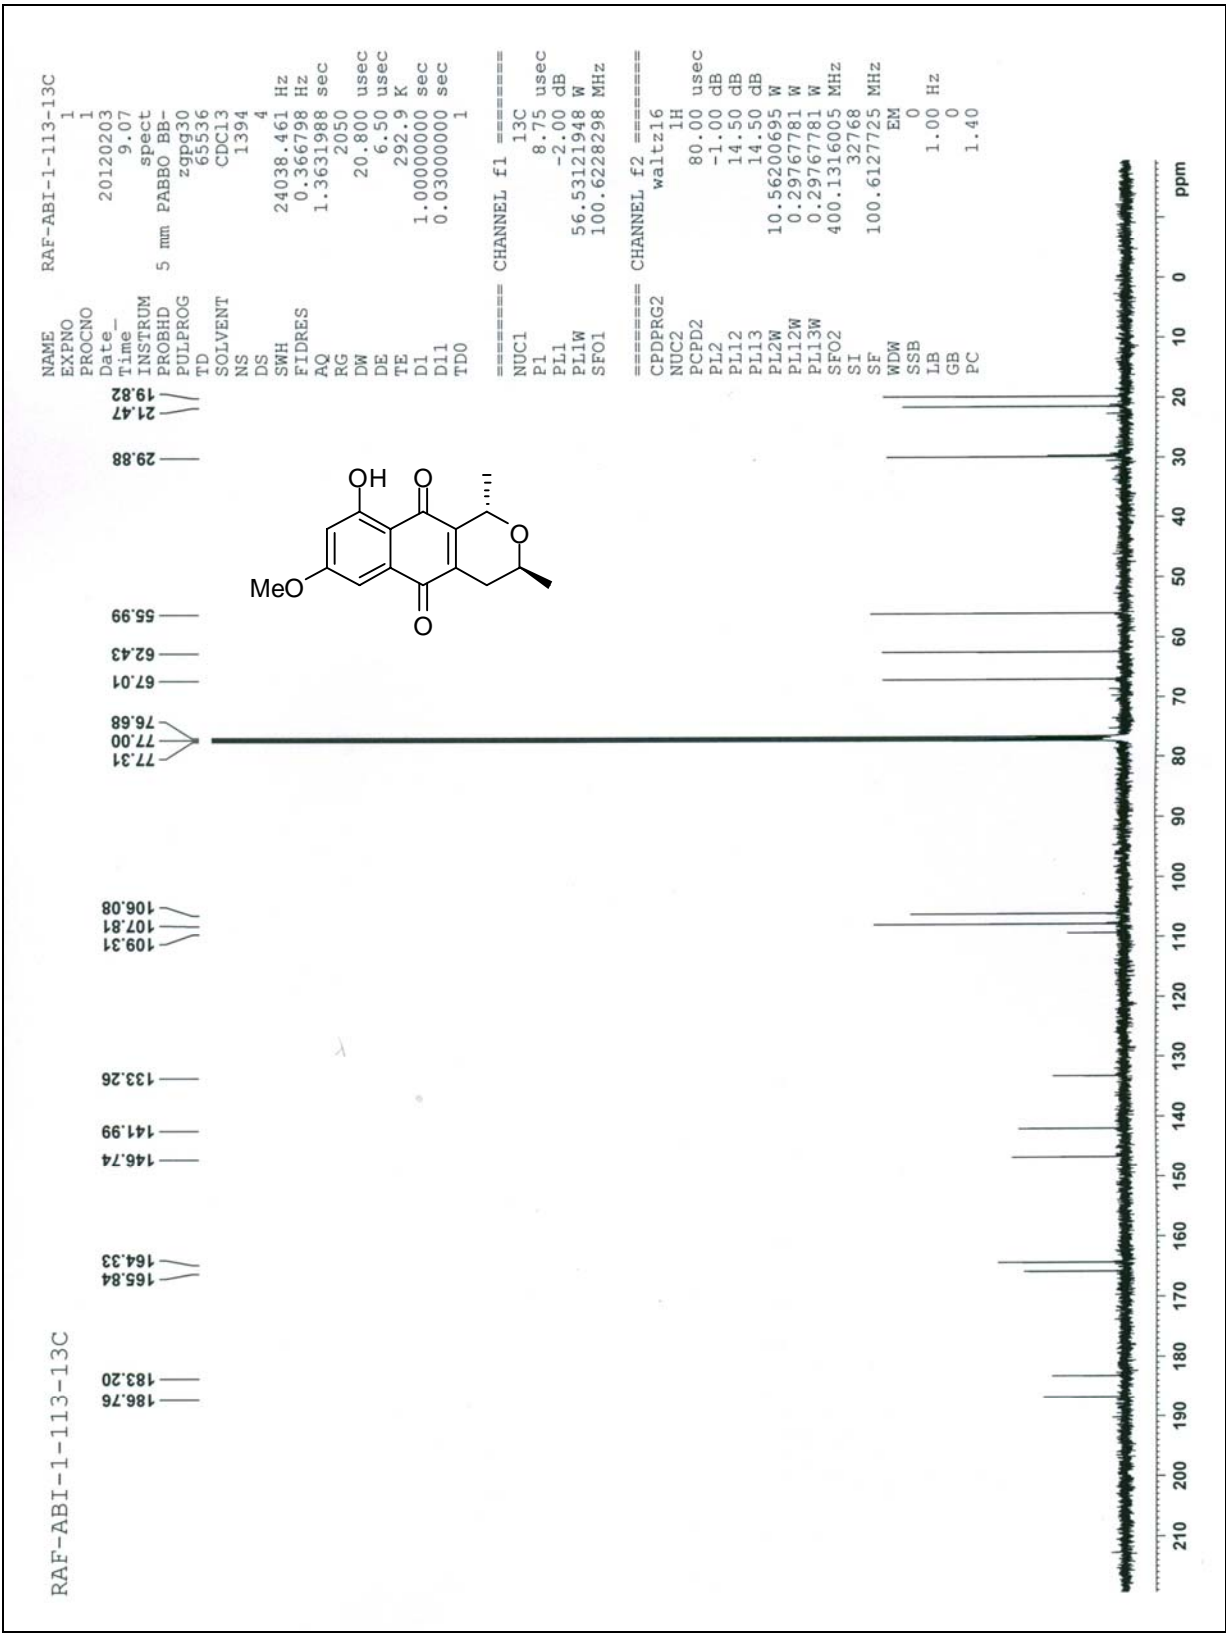

Compound 2 <sup>1</sup>H NMR (400 MHz, CDCl<sub>3</sub>/TMS)

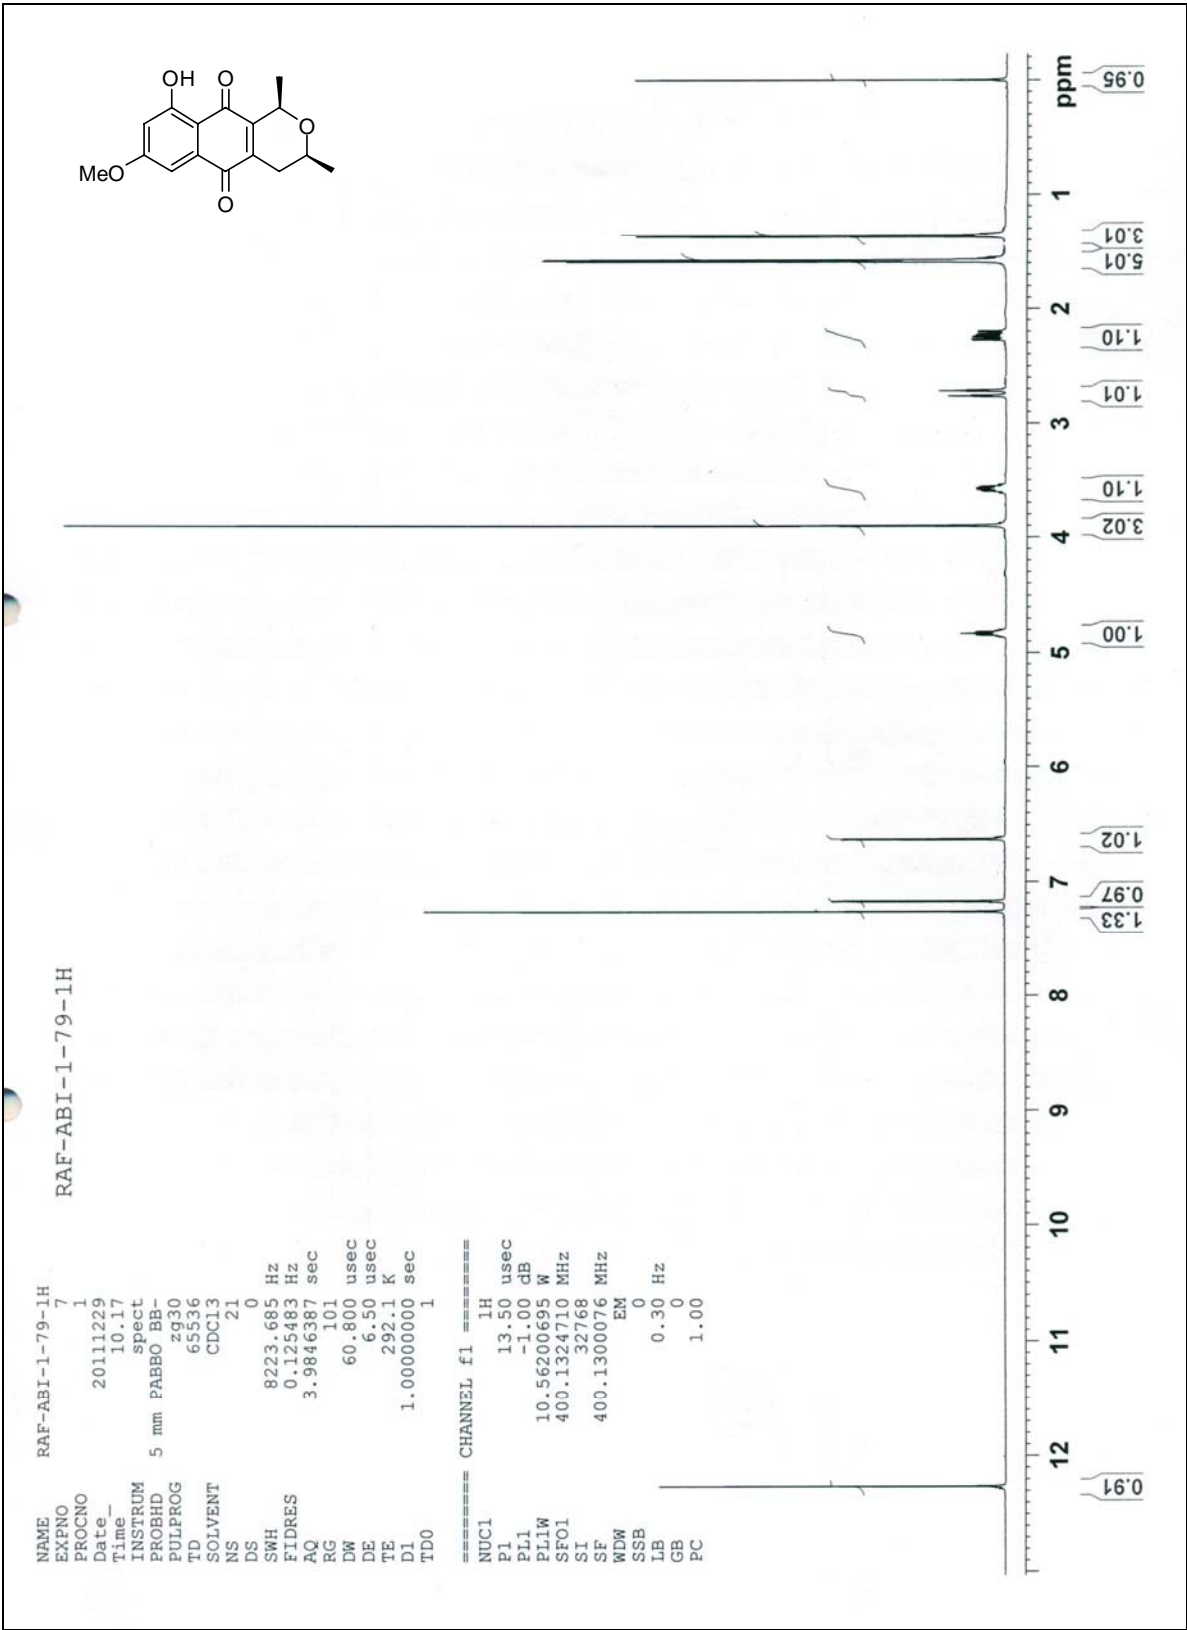

Compound 2 <sup>13</sup>C NMR (100 MHz)

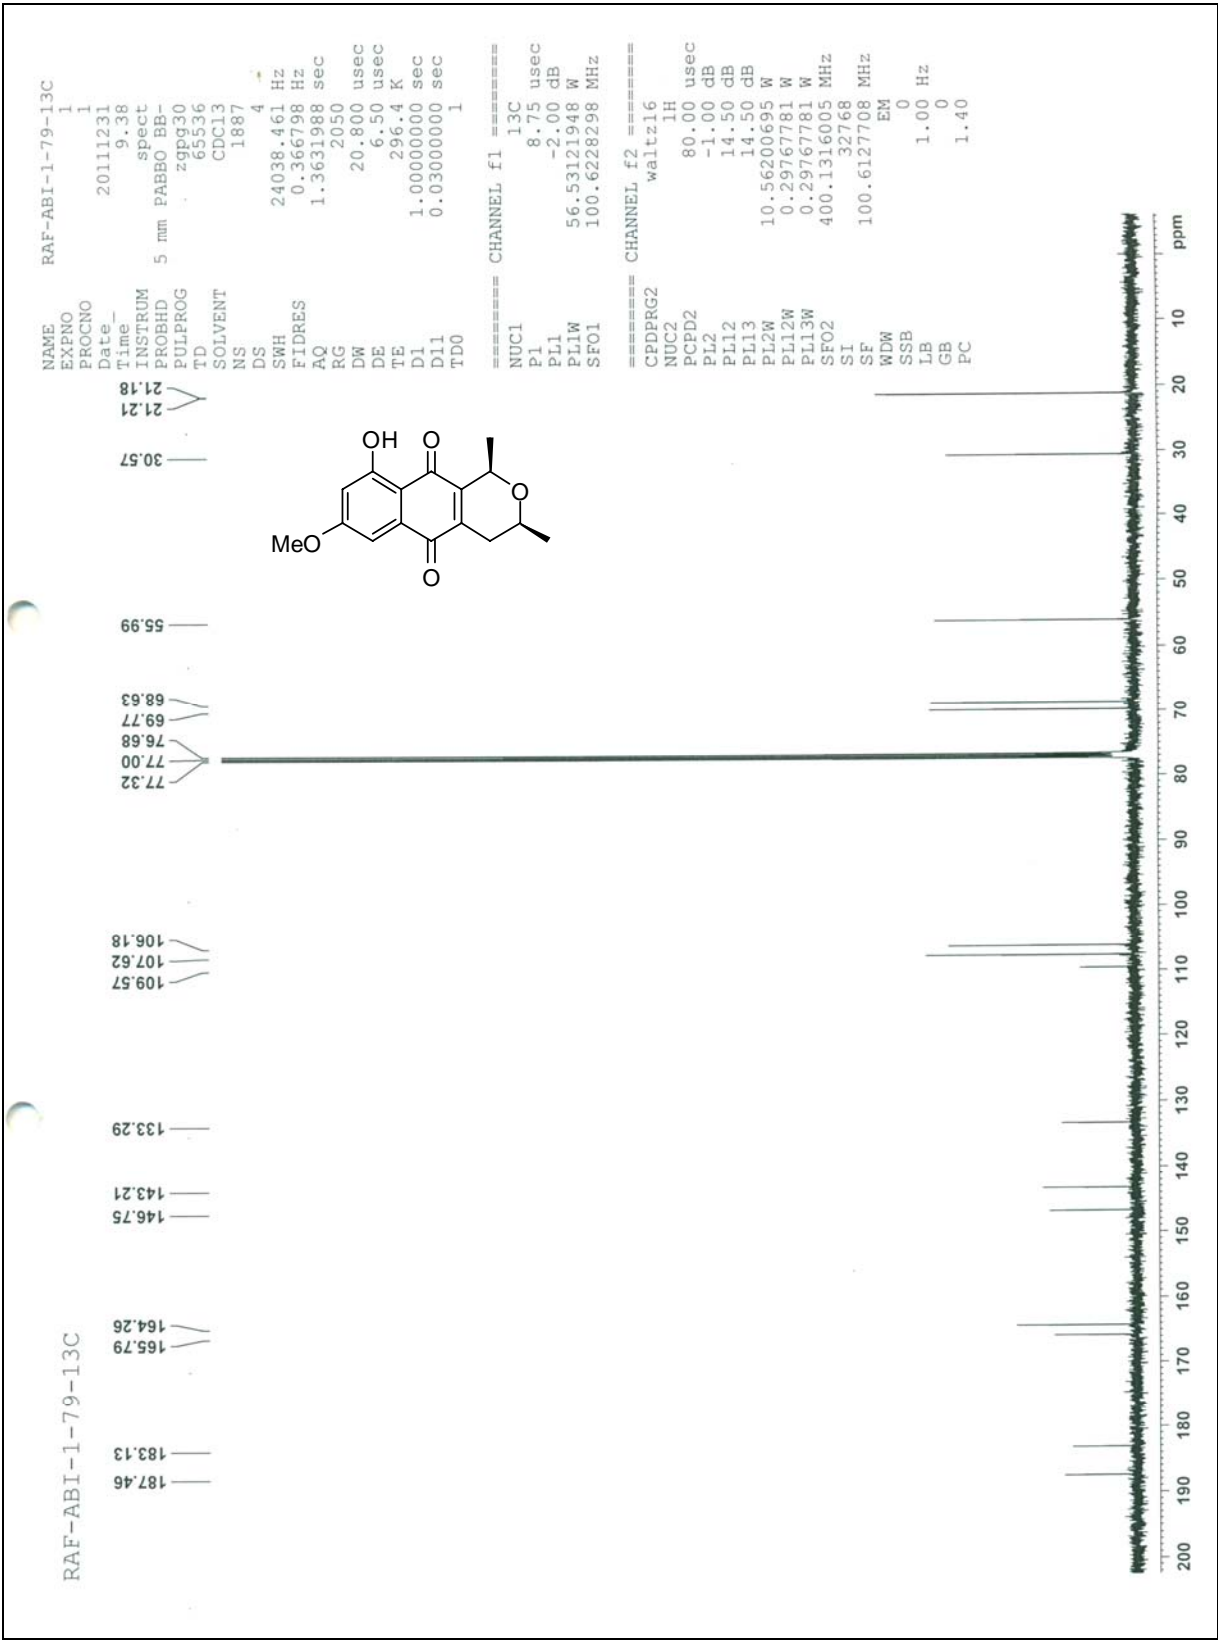

Supplement: c2ob25453k.pdf [file c2ob25453k.pdf]
